# Supplementary material for: Duplication and diversification of lectin receptor-like kinases (LecRLK) genes in soybean
Source: PubMed Central journal article supplement (PMC5897391; doi:10.1038/s41598-018-24266-6), 2018-04-12
Supplement: 41598_2018_24266_MOESM5_ESM.pdf [file 41598_2018_24266_MOESM5_ESM.pdf]

**Duplication and diversification of lectin receptor-like kinases  
(LecRLK) in soybean, as revealed by evolutionary,  
structural and expression analysis**

**Ping-Li Liu<sup>1</sup>, Yuan Huang<sup>2</sup>, Peng-Hao Shi<sup>1</sup>, Meng Yu<sup>1</sup>, Jian-Bo Xie<sup>1\*</sup>, LuLu Xie<sup>3\*</sup>**

**Supplemental Table S4 Primers for real time PCR.**

| Primers           | sequences                  |
|-------------------|----------------------------|
| Glyma.16G093900-F | 5'-GGTGTAATCTCTGTGAATGA-3' |
| Glyma.16G093900-R | 5'-ATGATGTAGGTTTCAGCG-3'   |
| Glyma.03G079500-F | 5'-TGATCTCTTCATTCGCGTGC-3' |
| Glyma.03G079500-R | 5'-AGAGGCAGCTCTTCCAGTTT-3' |
| Glyma.08G352100-F | 5'-TGCCATAGACACCATTAC-3'   |
| Glyma.08G352100-R | 5'-ATTACTGTGGATTGAGACTT-3' |
| Glyma.08G352300-F | 5'-AGCCCACACCGAACTTGATA-3' |
| Glyma.08G352300-R | 5'-TTGTGGCTTGGATGGTTTGG-3' |
| Glyma.13G248800-F | 5'-GACTCCACTCAAGGCTCA-3'   |
| Glyma.13G248800-R | 5'-ACACCATGCACCCTAATCCA-3' |
| Glyma.15G065200-F | 5'-ATACGAGAGAGAGTTCAGG-3'  |
| Glyma.15G065200-R | 5'-CACTGATCCCTATGCTTCG-3'  |
| Glyma.18G185500-F | 5'-GCTTCTCTATGCTGGATTC-3'  |
| Glyma.18G185500-R | 5'-TAACCTGCTGGAGTCATT-3'   |
| Glyma.07G154100-F | 5'-CTGGCGAGGCTCTATAACCA-3' |
| Glyma.07G154100-R | 5'-GGCAACTTCAAGGAGCACAA-3' |
| Glyma.18G205000-F | 5'-TTACCAAGGCCAAGCAAACC-3' |
| Glyma.18G205000-R | 5'-CTCCATCCTAGAAGATAGTG-3' |
| Glyma.03G051100-F | 5'-GCATCAACAGGTAAGAGGAA-3' |
| Glyma.03G051100-R | 5'-AACAGGCACAACAAGGTAA-3'  |
| Glyma.09G072500-F | 5'-GGGGAGGTCGCAACTTAGAT-3' |
| Glyma.09G072500-R | 5'-TCACAGTCCTCTCGTGCATT-3' |
| Glyma.15G181400-F | 5'-TCTGCTCCTTCTGCTTGCT-3'  |
| Glyma.15G181400-R | 5'-TTGGTCTTGTTAGGGTCCA-3'  |
